# Supplementary material for: Two reactive behaviors of chondrocytes in an IL-1β-induced inflammatory environment revealed by the single-cell RNA sequencing
Source: PubMed Central journal article supplement (PMC8109072; doi:10.18632/aging.202857), 2021-04-20
Supplement: aging-13-202857-s001.pdf [file aging-13-202857-s001.pdf]

**SUPPLEMENTARY FIGURES**

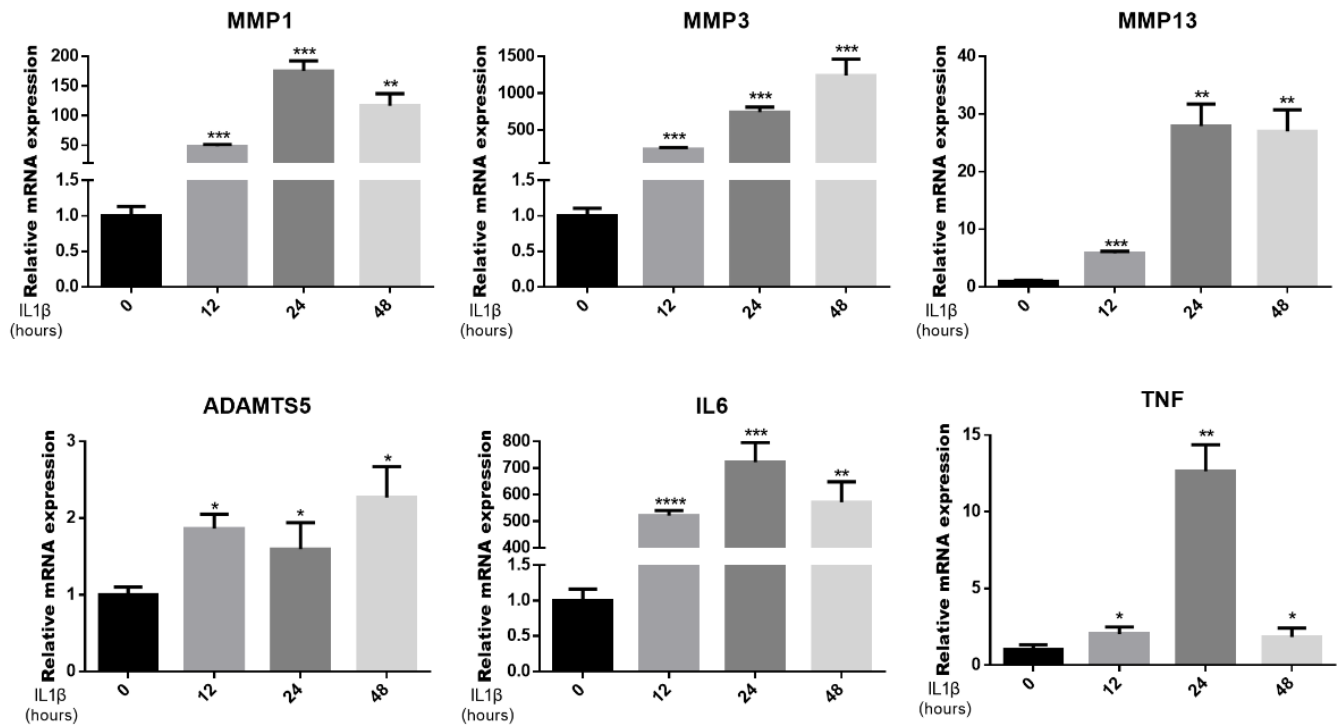

**Supplementary Figure 1. The catabolism-related and inflammatory gene expression.** Relative expressions of MMP1, MMP3, MMP13, ADAMTS5, TNF and IL6 by chondrocytes cultured under IL1β stimulation for 0-h, 12-h, 24-h and 48-h with all values normalized to expression levels of GAPDH. The expression level of the above genes in groups under IL1β stimulation for 12-h, 24-h and 48-h significantly increased compared with the group under IL1β stimulation for 0-h (the control). \*p < 0.05; \*\*p < 0.01; \*\*\*p < 0.001.

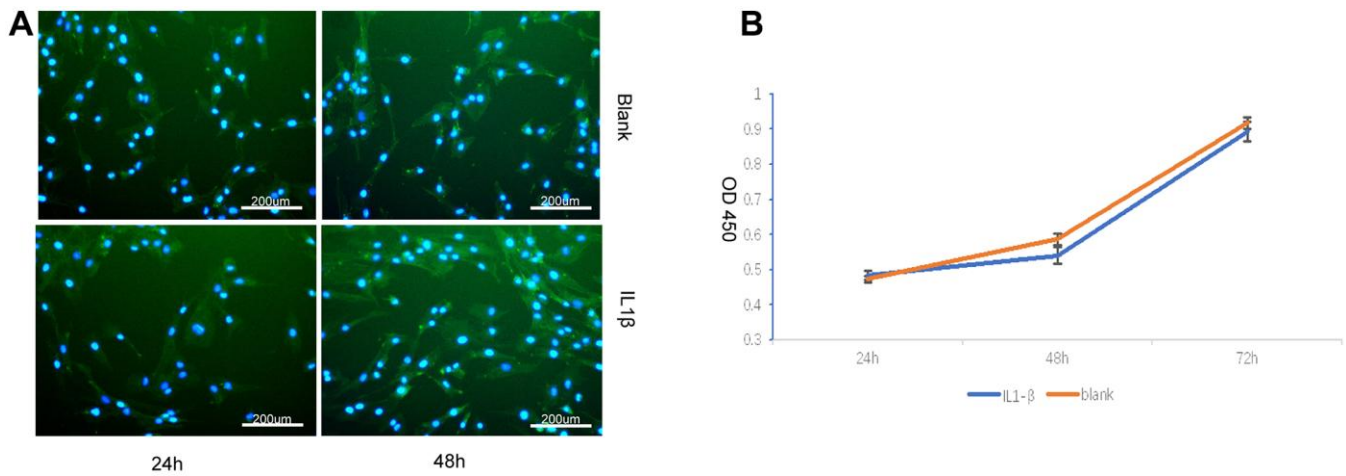

**Supplementary Figure 2. Cell proliferation and cell morphology.** (A) Cell morphology after 24-h and 48-h incubation with or without IL-1β (stained by phalloidin and DAPI). (B) Cell proliferation activity tested by CCK8. At 24-h, 48-h, and 72-h, the proliferation activities of cells incubated with or without IL-1β show no significant difference.

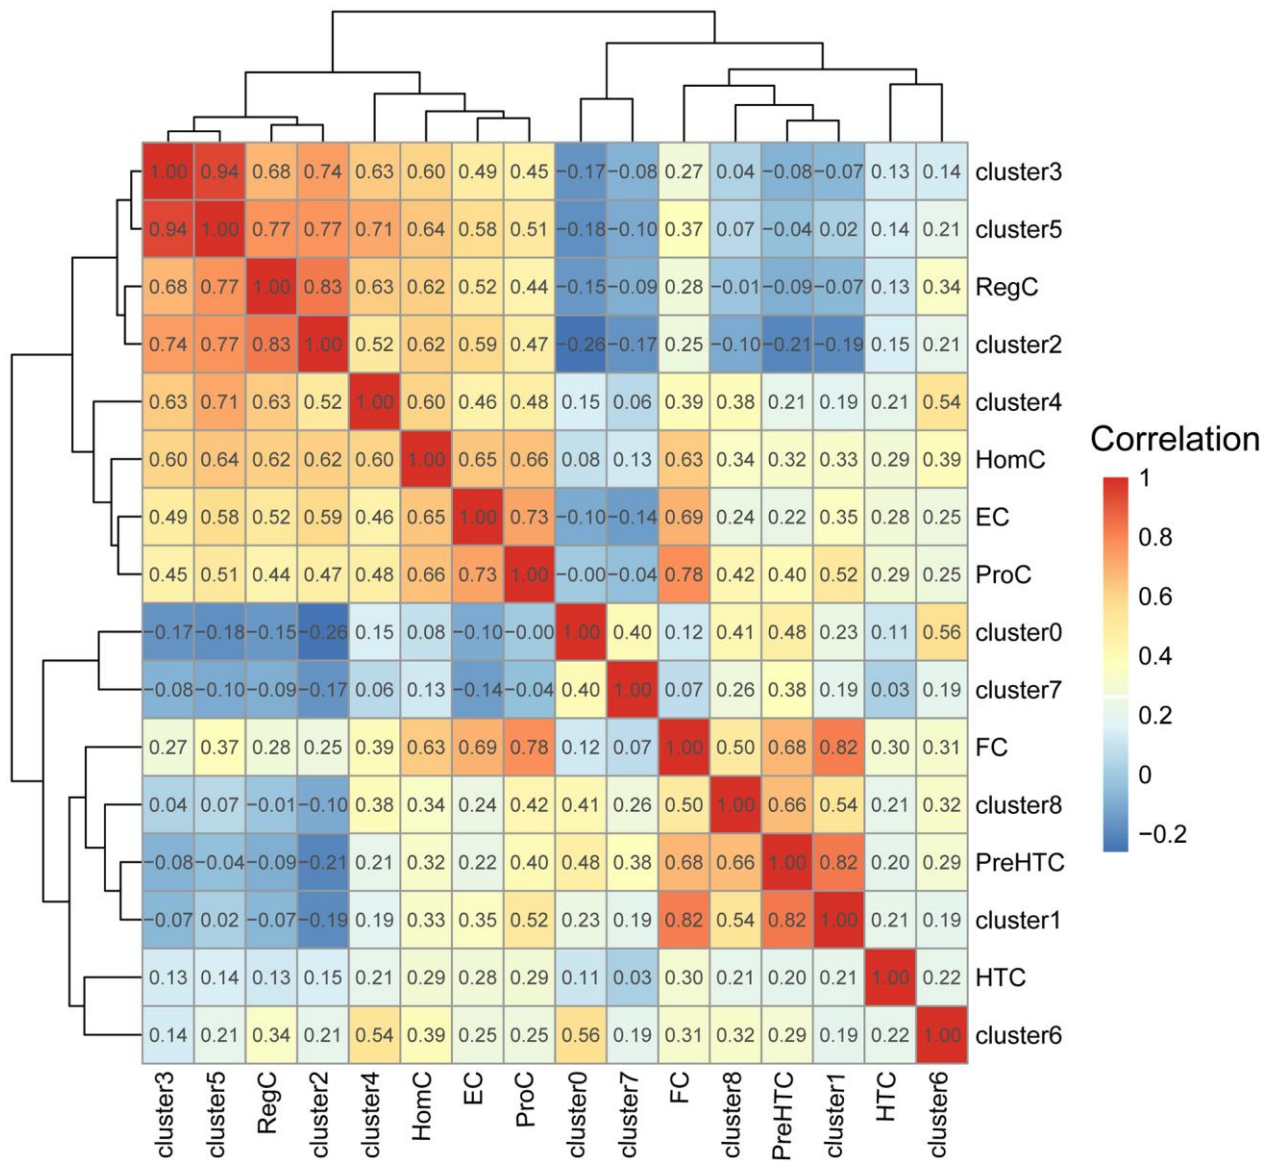

Supplementary Figure 3. The heatmap of correlations between cell clusters and previously-identified cell subpopulations.

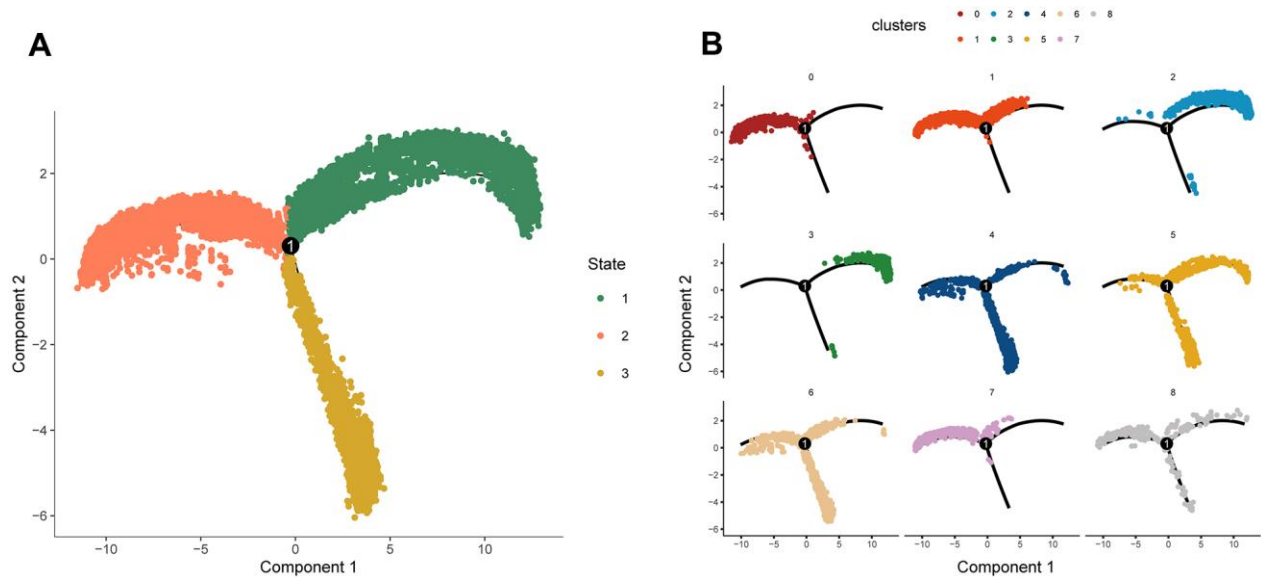

**Supplementary Figure 4. The distribution of cells along the pseudo-time trajectory.** (A) The distribution of each states along the pseudo-time trajectory. (B) The split distribution of each clusters along the pseudo-time trajectory.
