# Supplementary material for: Two reactive behaviors of chondrocytes in an IL-1β-induced inflammatory environment revealed by the single-cell RNA sequencing
Source: PubMed Central journal article supplement (PMC8109072; doi:10.18632/aging.202857), 2021-04-20
Supplement: aging-13-202857-s002.pdf [file aging-13-202857-s002.pdf]

## SUPPLEMENTARY TABLE

**Supplementary Table 1. Genes used to construct functional gene sets.**

| <b>Function</b>  | <b>Gene sets</b>                                                                                                                                                                                                                                                                                                     |
|------------------|----------------------------------------------------------------------------------------------------------------------------------------------------------------------------------------------------------------------------------------------------------------------------------------------------------------------|
| Circadian rhythm | BMAL1, CLOCK, CRY1, CRY2, NR1D1, PER1, PER2, PER3                                                                                                                                                                                                                                                                    |
| ECM              | ADAMTS5, B2M, COL11A1, COL1A1, COL1A2, COL3A1, COL5A1, COL5A2, COL6A1, COL6A2, COL6A3, DCN, HAPLN1, ITGA5, ITGB1, ITGB3, MMP13, MMP9, PRG4, SDC4, SOX5                                                                                                                                                               |
| Proliferation    | BAG1, ESR1, FOXA1, GPR160, MAPT, MLPH, NAT1, PGR                                                                                                                                                                                                                                                                     |
| Microvasculature | ACKR2, ACVRL1, ADCY4, AFAP1L1, ARAP3, C1orf54, CALCRL, CASKIN2, CDH5, CLDN5, COL4A3, CTTNBP2NL, DRAM1, EGFL7, EHD4, ELTD1, ENG, ENTPD1, EPAS1, EPHB4, ERG, ESAM, FAM110D, FGD5, GPR116, HBEGF, HILPDA, HSPA12B, ICAM1, ICAM2, KDR, KIFC1, LATS2, LRRK1, MMRN2, MYO1B, NOTCH4, NPNT, NPR3, PALD1, PECAM1, PLTP, PTPRB |
| Inflammation     | IFNG, IFNGR1, IFNGR2, IL10, IL12A, IL12B, IL12RB1, IL12RB2, IL13, IL17A, IL17F, IL18, IL18R1, IL18RAP, IL1A, IL1B, IL2, IL21, IL21R, IL22, IL23A, IL23R, IL2RG, IL4, IL4R, IL5, IL6, JUN, NFKB1, RELA, RORA, RORC, S100A8, S100A9, STAT1, STAT3, STAT4, STAT6, TGFB1, TGFB2, TGFB3, TNF                              |
