# Supplementary material for: Two reactive behaviors of chondrocytes in an IL-1β-induced inflammatory environment revealed by the single-cell RNA sequencing
Source: Aging (Albany NY). 2021 Apr 20;13(8):11646–64. doi: 10.18632/aging.202857 (PMC8109072; doi:10.18632/aging.202857)
Supplement: Supplementary File 1 [file aging-13-202857-s003.xlsx]

## Sheet: The R code used in this study
Supplementary File 1. The R code used in this study.
library(Seurat)
library(tidyverse)
matrix_dir <- "~/data/matrix/"
sample_name <- c("Blank","IL24","IL48")
dir <- paste0(matrix_dir,sample_name)
scRNAlist <- list()
for(i in 1:length(dir)){
counts <- Read10X(data.dir = dir[i])
scRNAlist[[i]] <- CreateSeuratObject(counts,min.features = 100,project = sample_name[i])
}
merge_seurat <- merge(scRNAlist[[1]],y=c(scRNAlist[[2]],scRNAlist[[3]]))
saveRDS(merge_seurat,"merge_seurat.rds")
merge_seurat$log10GenesPerUMI <- log10(merge_seurat$nFeature_RNA) / log10(merge_seurat$nCount_RNA)
merge_seurat$mitoRatio <- PercentageFeatureSet(object = merge_seurat,pattern = "^MT-")
merge_seurat$mitoRatio <- merge_seurat@meta.data$mitoRatio/100
metadata <- merge_seurat@meta.data
metadata$cells <- rownames(metadata)
metadata <- metadata %>%
dplyr::rename(seq_folder = orig.ident,
nUMI = nCount_RNA,
nGene = nFeature_RNA)
metadata$sample <- metadata$seq_folder
merge_seurat@meta.data <- metadata
filtered_seurat <- subset(x = merge_seurat,
subset= (nUMI >= 500) &
(nGene >= 200) &
							(nGene < 25000) &
(log10GenesPerUMI > 0.80) &
(mitoRatio < 0.20))
counts <- GetAssayData(object = filtered_seurat, slot = "counts")
nonzero <- counts > 0
keep_genes <- Matrix::rowSums(nonzero) >= 10
filtered_counts <- counts[keep_genes, ]
filtered_seurat <- CreateSeuratObject(filtered_counts, meta.data = filtered_seurat@meta.data)
split_seurat <- SplitObject(filtered_seurat, split.by = "sample")
split_seurat <- split_seurat[c("Blank","IL24","IL48")]
for (i in 1:length(split_seurat)) {
split_seurat[[i]] <- NormalizeData(split_seurat[[i]], verbose = FALSE)
split_seurat[[i]] <- FindVariableFeatures(split_seurat[[i]], selection.method = "vst",
nfeatures = 3000, verbose = FALSE)
}
scRNA.anchors <- FindIntegrationAnchors(object.list = split_seurat,dims = 1:40)
seurat_integrated <- IntegrateData(anchorset = scRNA.anchors,dims = 1:40)
saveRDS(seurat_integrated,file.path(out.path,"integrated_seurat.rds"))
DefaultAssay(seurat_integrated) <- "integrated"
seurat_integrated <- ScaleData(seurat_integrated, verbose = FALSE)
seurat_integrated <- RunPCA(seurat_integrated, npcs = 100, verbose = FALSE)
ggsave("ElbowPlot.pdf", plot = ElbowPlot(seurat_integrated, ndims=100), width=8, height=6)
pc.num <- 1:10
seurat_integrated <- FindNeighbors(object = seurat_integrated,
dims = pc.num)
seurat_integrated <- FindClusters(seurat_integrated,resolution = 0.5)
seurat_integrated <- RunTSNE(seurat_integrated,dims = pc.num,check_duplicates=FALSE)
saveRDS(seurat_integrated,"seurat_intergrated_tsne.rds")
#correlation analysis
genelist_values <- function(geneset,SeuratObject){
expr_all <- as.matrix(GetAssayData(SeuratObject, slot = "counts"))
geneset_expr <- expr_all[rownames(expr_all) %in% geneset,]
geneset_values <- as.numeric(colMeans(geneset_expr))
return(geneset_values)
}
dat <- genelist_values(as.character(gene_list),seurat)
M=cor(dat)
pdf("seurat.corheatmap.pdf"))
pheatmap::pheatmap(M,display_numbers = TRUE)
dev.off()
